# Supplementary material for: Human Primary Breast Cancer Stem Cells Are Characterized by Epithelial-Mesenchymal Plasticity
Source: PubMed Central journal article supplement (PMC7918351; doi:10.3390/ijms22041808), 2021-02-11
Supplement: ijms-22-01808-s001.pdf [file ijms-22-01808-s001.pdf]

### Supplementary Materials

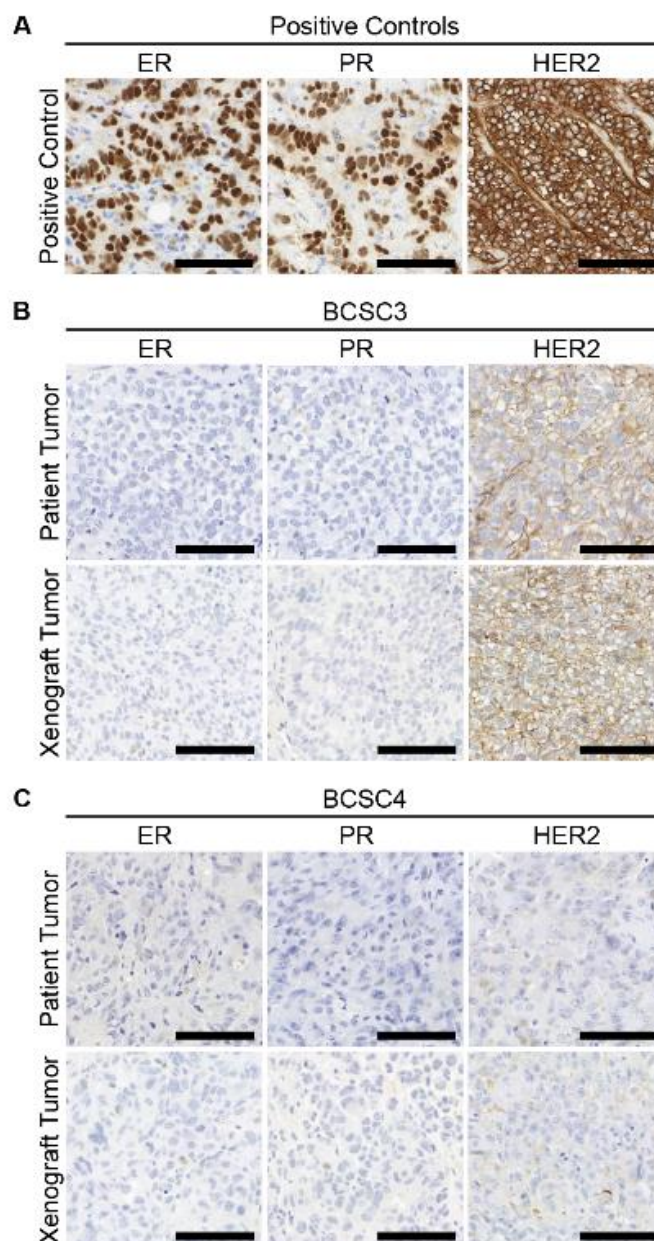

**Figure S1.** BCSC patient and xenograft tumor tissues are classified as triple-negative. (A) Representative images of positive controls for ER, PR, and HER2 expression. (B, C) Patient and xenograft tumor tissue of BCSC3 (B) and BCSC4 (C) were fixed, paraffin-embedded, and sectioned. Depicted are representative images of immunohistochemical analysis of ER, PR, and HER2 expression. Scale bars represent 100 μm.

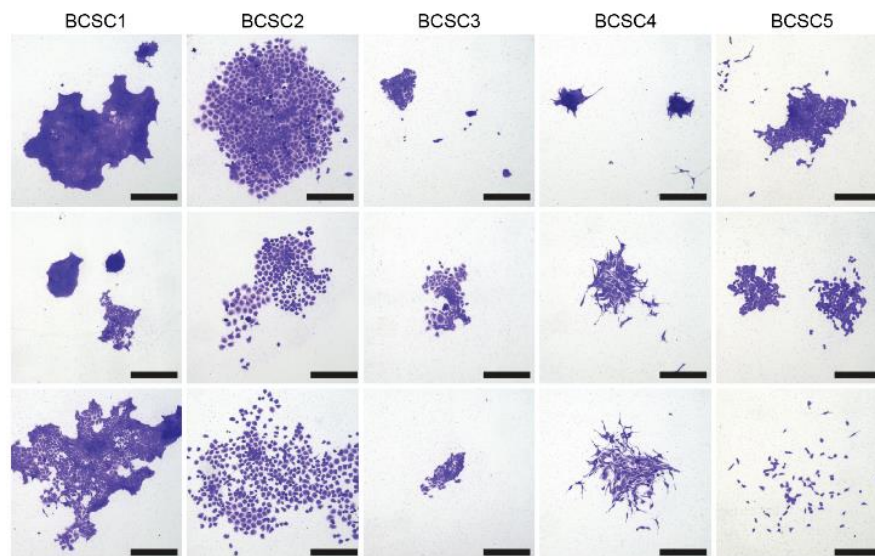

**Figure S2.** BCSCs exhibit morphological heterogeneity in vitro. BCSCs were seeded as single cells in a 2D environment and grown for 8 days. Cells were fixed and stained with crystal violet to enable better observation of the colony morphologies. For each BCSC line three exemplary colony morphologies are depicted. Scale bars represent 400  $\mu\text{m}$ .

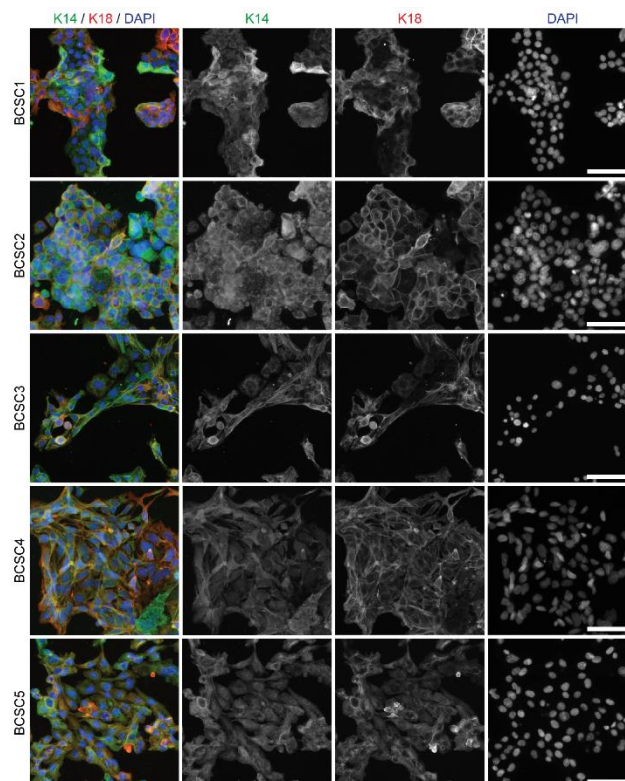

**Figure S3.** BCSCs express myoepithelial keratin 14 and luminal epithelial keratin 18. Representative images depicting immunofluorescence staining of BCSCs using antibodies against K14 and K18. Nuclei were counterstained with DAPI. Merge and single channels of extended depth of focus z-stack images are shown. Scale bars represent 100  $\mu\text{m}$ .

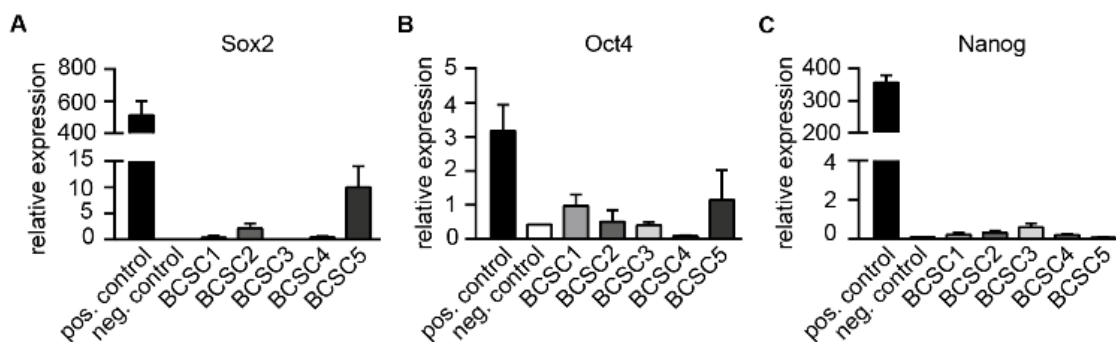

**Figure S4.** Expression of stem cell-related transcription factors in BCSCs. Analysis of Sox2 (A), Oct4 (B) and Nanog (C) mRNA expression in BCSCs using qRT-PCR. Depicted mRNA levels are relative to the housekeeping gene HPRT1 (n=3). Data represents means + SEM.

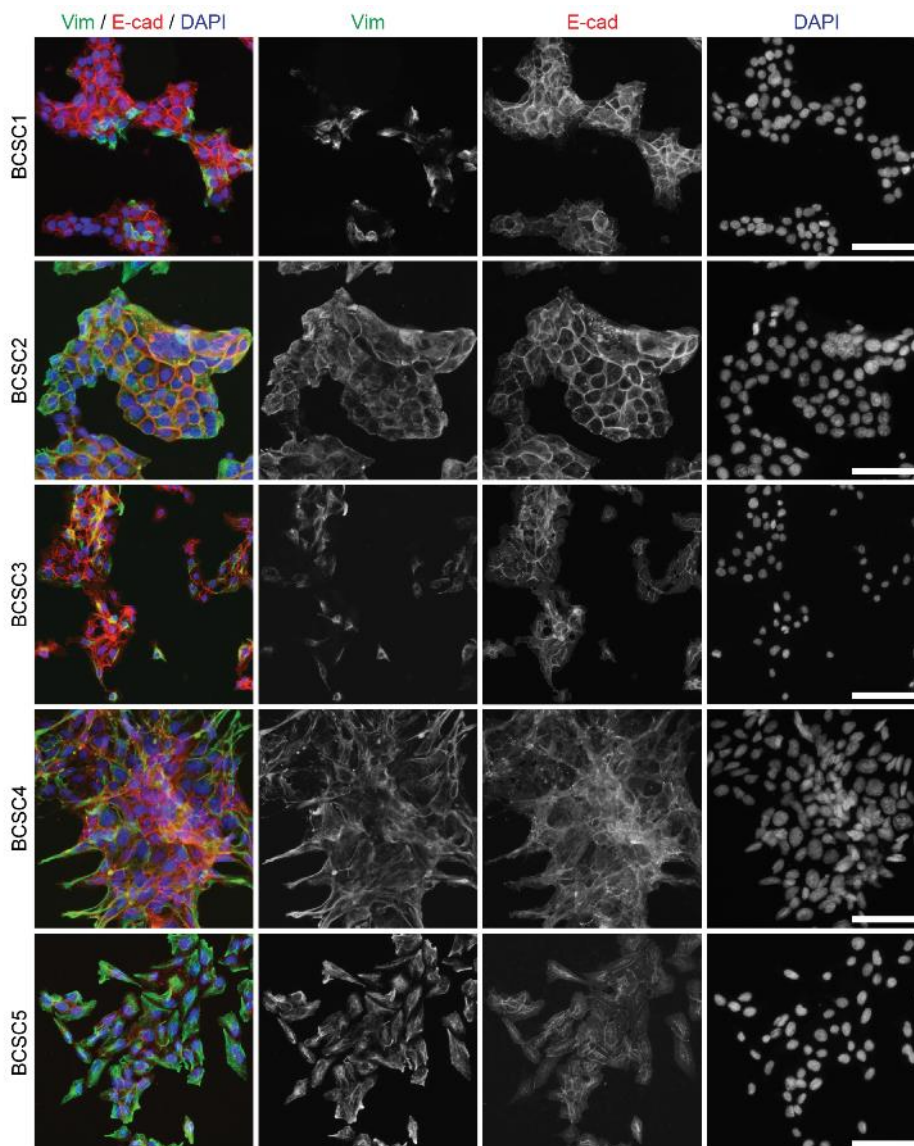

**Figure S5.** BCSCs co-express E-cadherin and vimentin. Single channels of immunofluorescence analysis of BCSCs shown in Figure 3A. Antibodies against epithelial E-cadherin (red) and mesenchymal vimentin (green) were used. Cell nuclei were counterstained with DAPI. Scale bars represent 100  $\mu$ m.



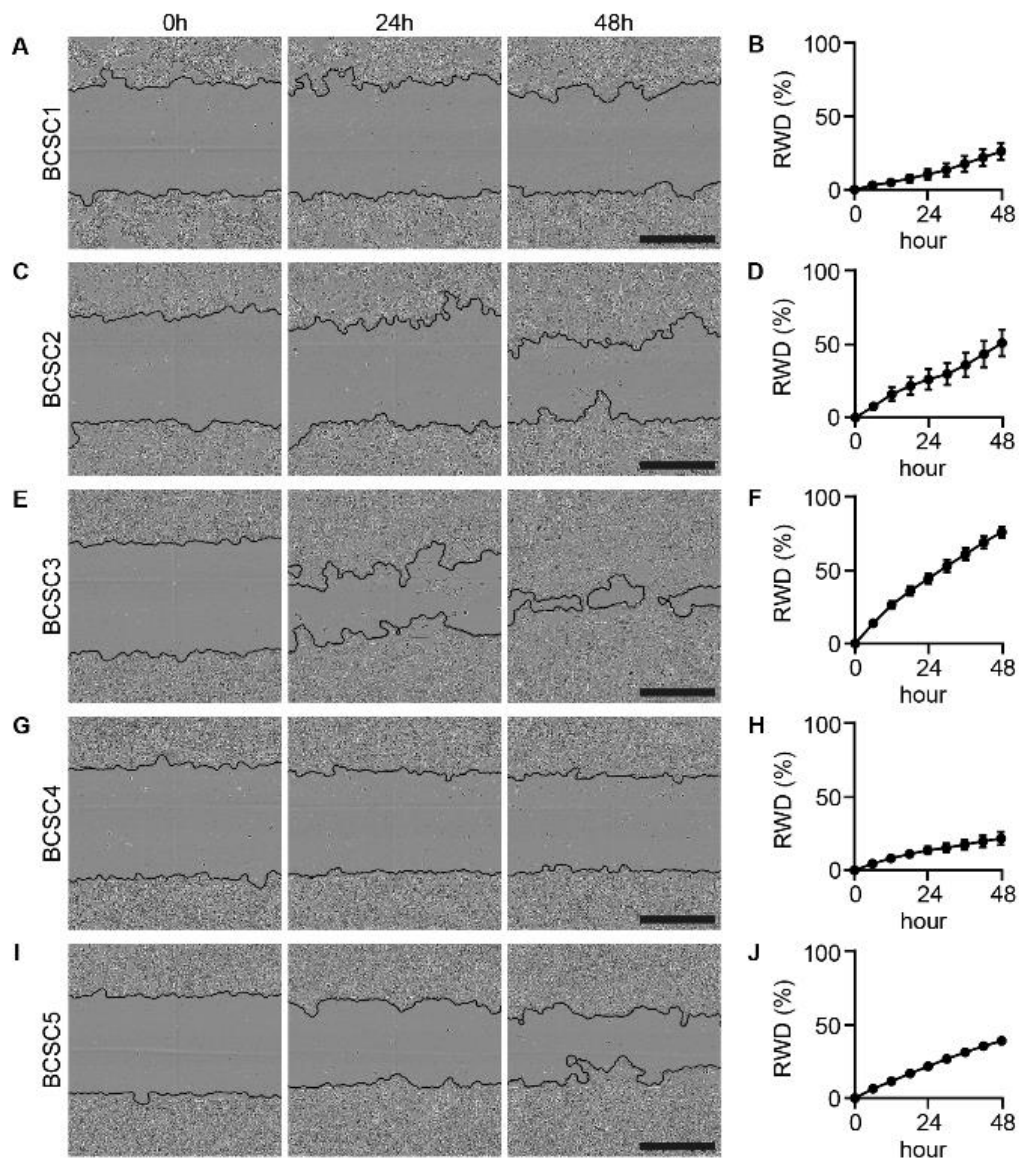

**Figure S6. BCSCs differ in their migratory potential.** BCSCs were grown to 100% confluency, scratch wounds were inflicted, and cell migration was monitored over 48 h. (A, C, E, G, I) Depicted are representative images at 0 h, 24 h and 48 h for each cell line. Detected wound edges are marked in each case by a black line. Scale bars represent 500  $\mu\text{m}$ . (B, D, F, H, J) Quantification of wound closure is depicted in relative wound density (RWD) in percent ( $n=2$ ). Data represents means  $\pm$  SEM.

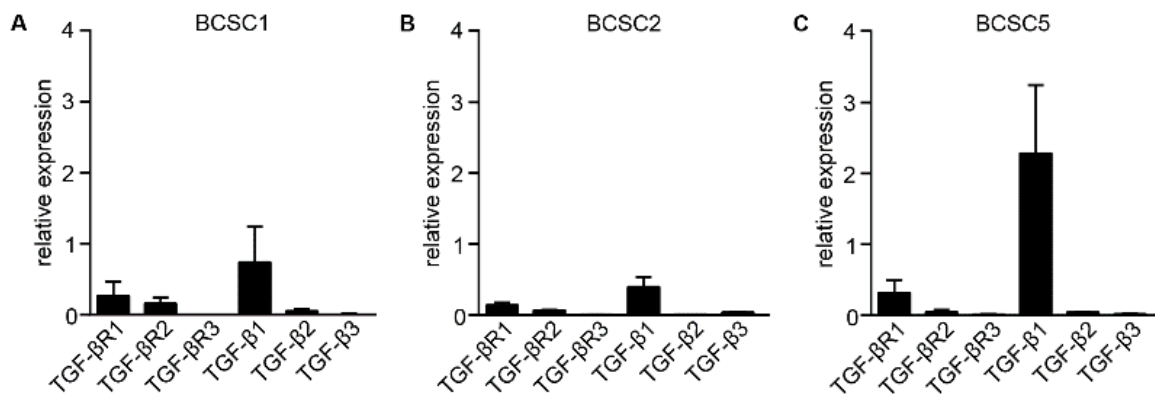

**Figure S7.** BCSCs express genes related to the TGF- $\beta$  signaling pathway. (A-C) Analysis of TGF- $\beta$ -related receptors and ligands analyzed by qRT-PCR. Values are mRNA levels relative to HPRT1 (n=3). Data represents means + SEM.

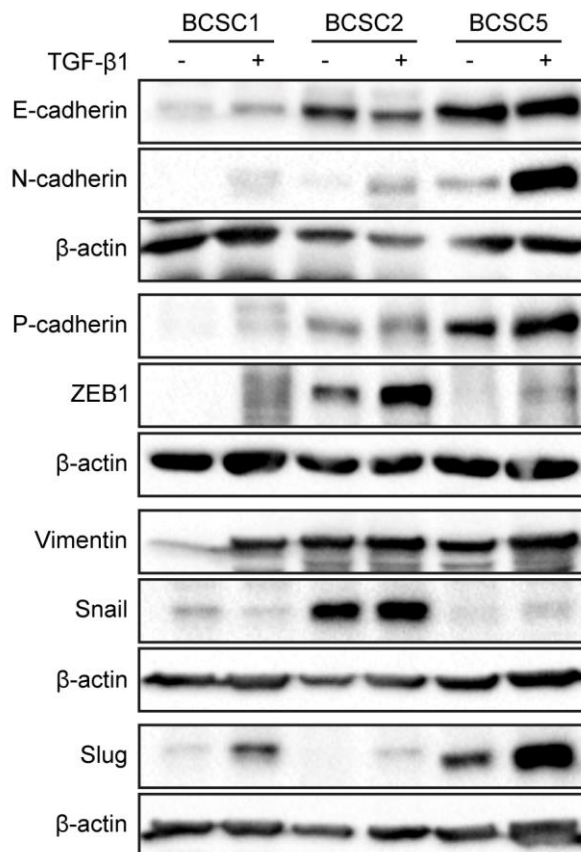

**Figure S8.** Expression of EMT-related markers at the protein level after TGF- $\beta$ 1 stimulation. Expression of different EMT-related proteins was analyzed by SDS-PAGE and Western blot in BCSC1, BCSC2, and BCSC5 with and without TGF- $\beta$ 1 stimulation (n=1).  $\beta$ -actin served as loading control and is depicted for each individual Western blot membrane.

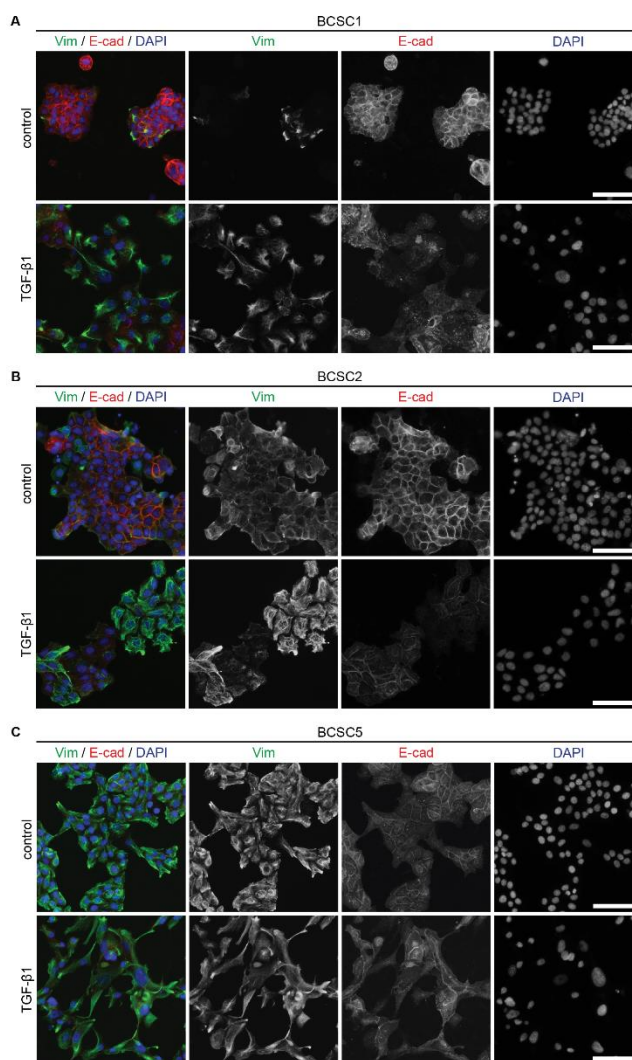

**Figure S9.** E-cadherin and vimentin expression of BCSCs after TGF- $\beta$ 1 stimulation. Immunofluorescence analysis of BCSC1 (A), BCSC2 (B), and BCSC5 (C) using antibodies against epithelial E-cadherin (red) and mesenchymal vimentin (green). Cell nuclei were counterstained with DAPI. Scale bars represent 100  $\mu$ m.

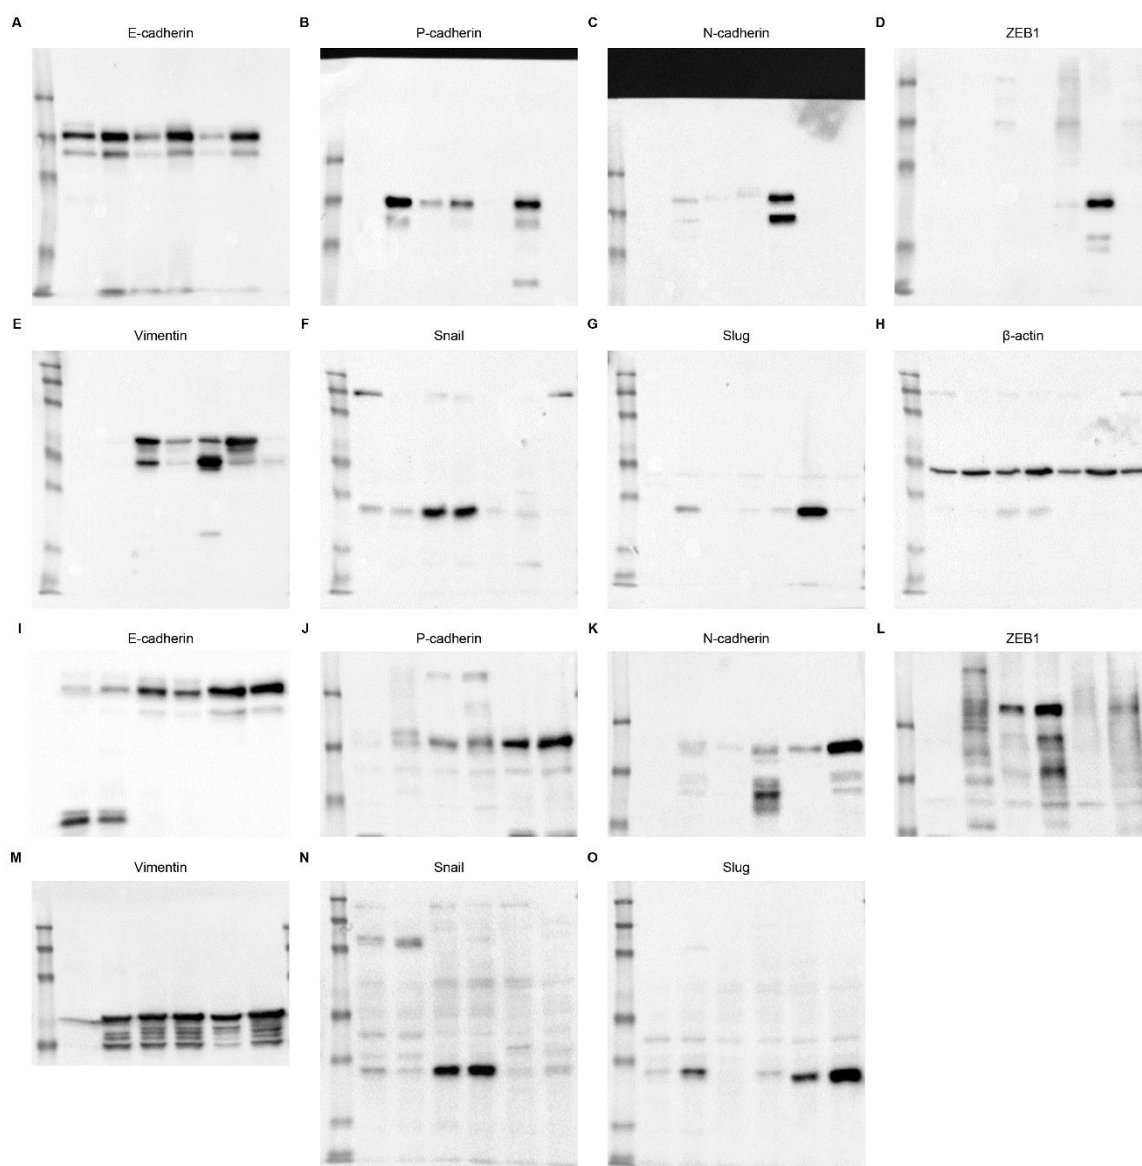

**Figure S10.** Uncropped Western blots. Depicted are the uncropped Western blots for Figure 3K (A-H) and Supplementary Figure S8 (I-O).

|            | MCF7 | BCSC1 | BCSC2 | BCSC3 | BCSC4 | BCSC5 | MDA-MB-231 |
|------------|------|-------|-------|-------|-------|-------|------------|
| E-cadherin | 3.58 | 4.11  | 0.74  | 1.02  | 0.78  | 0.89  | ND         |
| N-cadherin | ND   | 0.26  | 0.08  | 0.05  | 8.34  | ND    | ND         |
| ZEB1       | ND   | ND    | 0.57  | ND    | 7.23  | ND    | 0.36       |
| P-cadherin | ND   | 1.05  | 0.36  | 0.80  | ND    | 0.80  | ND         |
| Snail      | 0.39 | 0.17  | 1.78  | 0.87  | 0.16  | 0.14  | ND         |
| Slug       | ND   | 0.24  | ND    | 0.02  | 0.11  | 1.45  | ND         |
| Vimentin   | ND   | ND    | 0.91  | 0.19  | 0.33  | 0.98  | ND         |

  

|                | BCSC1 |      | BCSC2 |      | BCSC5 |      |
|----------------|-------|------|-------|------|-------|------|
| TGF- $\beta$ 1 | -     | +    | -     | +    | -     | +    |
| E-cadherin     | 0.19  | 0.25 | 1.06  | 0.99 | 1.79  | 1.33 |
| N-cadherin     | 0.01  | 0.15 | 0.05  | 0.56 | 0.30  | 1.70 |
| P-cadherin     | 0.04  | 0.26 | 0.45  | 0.63 | 0.75  | 1.23 |
| ZEB1           | 0.01  | 0.76 | 0.70  | 1.49 | 0.22  | 0.72 |
| Vimentin       | 0.04  | 0.65 | 1.79  | 1.43 | 0.84  | 0.92 |
| Snail          | 0.26  | 0.14 | 2.50  | 1.81 | 0.15  | 0.16 |
| Slug           | 0.10  | 0.58 | 0.08  | 0.14 | 0.72  | 1.10 |

**Figure S11.** Densitometry readings/intensity ratios relative to  $\beta$ -actin. Depicted are the densitometry readings/intensity ratios relative to the corresponding  $\beta$ -actin expression level for the Western blots shown in Figure 3K (A) and Supplementary Figure 8 (B). The data was analyzed using ImageJ.

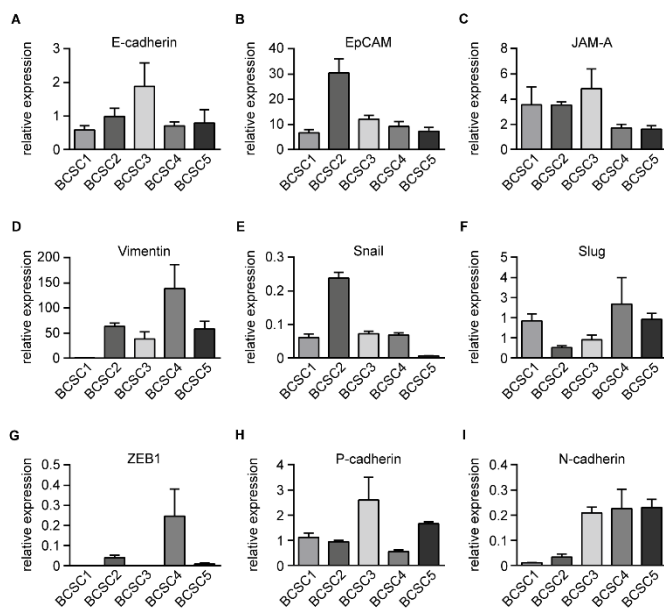

**Figure S12.** BCSCs co-express epithelial and mesenchymal markers in 3D cultures. (A–I) Analysis of EMT-related gene expression in BCSCs cultured in 50% Matrigel at the mRNA level using qRT-PCR. Shown are mRNA levels of E-cadherin (A), EpCAM (B), JAM-A (C), Vimentin (D), Snail (E), Slug (F), ZEB1 (G), P-cadherin (H), and N-cadherin (I) relative to HPRT1 ( $n \geq 3$ ). Data represents means + SEM.



**Table S1.** List of antibodies.

|                      | <b>Antigen</b>                                   | <b>Application</b> | <b>Manufacturer</b>               | <b>Dilution</b>  |
|----------------------|--------------------------------------------------|--------------------|-----------------------------------|------------------|
| Primary Antibodies   | CD24                                             | Flow cytometry     | eBioscience (46-0247)             | 1:100            |
|                      | CD44                                             | Flow cytometry     | eBioscience (12-0441-81)          | 1:000            |
|                      | CD49f                                            | Flow cytometry     | eBioscience (46-0495)             | 1:200            |
|                      | E-cadherin                                       | IHC                | Dako (IR059)                      | RTU <sup>1</sup> |
|                      | E-cadherin                                       | IF                 | BD Biosciences (610182)           | 1:400            |
|                      |                                                  | WB                 |                                   | 1:5000           |
|                      | EpCAM                                            | Flow cytometry     | eBioscience (660 50-9326)         | 1:100            |
|                      | ER                                               | IHC                | Dako (IR084)                      | RTU <sup>1</sup> |
|                      | HER2                                             | IHC                | Dako (A0485)                      | 1:350            |
|                      | Keratin 14                                       | IF                 | Covance (PRB-155P)                | 1:250            |
|                      | Keratin 18                                       | IF                 | Dako (M7010)                      | 1:250            |
|                      | Keratin 5                                        | IF                 | Covance (PRB-160P)                | 1:250            |
|                      | Keratin 5/6                                      | IHC                | Dako (IR780)                      | RTU              |
|                      | Keratin 8                                        | IF                 | Sigma-Aldrich (C5301)             | 1:250            |
|                      | Keratin 8/18                                     | IHC                | Dako (IR094)                      | RTU <sup>1</sup> |
|                      | Ki67                                             | IHC                | Dako (IR626)                      | RTU <sup>1</sup> |
|                      | N-cadherin                                       | WB                 | Cell Signaling Technology (13116) | 1:1000           |
|                      | P-cadherin                                       | WB                 | Cell Signaling Technology (2130)  | 1:1000           |
|                      | PR                                               | IHC                | Dako (IR068)                      | RTU <sup>1</sup> |
|                      | Slug                                             | WB                 | Cell Signaling Technology (9585)  | 1:1000           |
|                      | Snail                                            | WB                 | Cell Signaling Technology (3879)  | 1:1000           |
|                      | Vimentin                                         | IHC                | Dako (IR630)                      | RTU <sup>1</sup> |
|                      | Vimentin                                         | IF                 | GeneTex (GTX16700)                | 1:50             |
|                      |                                                  | WB                 |                                   | 1:1000           |
|                      | ZEB1                                             | WB                 | Sigma-Aldrich (HPA027524)         | 1:5000           |
|                      | β-actin                                          | WB                 | Sigma-Aldrich (A5441)             | 1:5000           |
| Secondary Antibodies | Donkey anti-mouse IgG (H+L) Alexa Fluor 568      | IF                 | Life Technologies (A10037)        | 1:250            |
|                      | Donkey anti-rabbit IgG (H+L) Alexa Fluor 488     | IF                 | Life Technologies (A21206)        | 1:250            |
|                      | Goat anti-mouse IgG (H+L) HRP                    | WB                 | Thermo Fisher Scientific (31430)  | 1:25000          |
|                      | Peroxidase-AffiniPure Goat anti-rabbit IgG (H+L) | WB                 | Dianova (111-035-144)             | 1:25000          |
|                      |                                                  |                    |                                   |                  |

<sup>1</sup> RTU = ready-to-use.

**Table S2. Oligonucleotides for qRT-PCR.** All oligonucleotides are listed from 5'→3' and were purchased from Sigma-Aldrich or Eurofins.

| Gene       | Forward (5'-3')         | Reverse (5'-3')           | UPL |
|------------|-------------------------|---------------------------|-----|
| E-cadherin | cccgggacaacgtttattac    | gctggctcaagtcaaagtcc      | 35  |
| EpCAM      | ccatgtgctgggtgtgtaa     | tgtgttttagttcaatgatgatcca | 3   |
| HPRT1      | tgaccttgattatfttgcatacc | cgagcaagacgttcagtcct      | 73  |
| JAM-A      | tcaaggtcaagctcatcgtg    | ggcagaggaggggatgtta       | 58  |
| N-cadherin | agtatccggtccgatctgc     | ctgtggggtcattgtcagc       | 80  |
| P-cadherin | gctggggaaagtattcatgg    | cctttccttcagtgaccttctt    | 61  |
| Slug       | tggttgctcaaggacacat     | gcaaatgctctgttgacgtg      | 7   |
| Snail      | gctgcaggactctaattccaga  | atctccggaggtgggatg        | 11  |
| TGF-β1     | actactacgccaaggaggacac  | tgcttgaactgtcatagatttcg   | 31  |
| TGF-β2     | acaacacctctggctcagt     | tagaaagtgggagggatg        | 50  |
| TGF-β3     | aagaagcgggcttggac       | cgcacacagcagttctcc        | 38  |
| TGF-βR1    | aaattgctcgacgatgtcc     | cataataaggcagttgtaacttca  | 31  |
| TGF-βR2    | caccgcacgttcagaagtc     | tggatgggcagtcctattaca     | 43  |
| TGF-βR3    | gattcatctcggcttgaaa     | gctcaggaggaaatagtgtgga    | 82  |
| Vimentin   | gaccagctaaccaacgacaaa   | gaagcatctcctcctgcaat      | 39  |
| ZEB1       | aactgctgggaggatgacac    | tcctgctcatctgcctga        | 57  |
